# Supplementary material
Source: publisher figshare collection journal article supplement (https://karger.figshare.com/ndownloader/files/31070938)
Supplement: Supplementary file 1 [file 31070938]

**Supplementary Table 2:** Baseline characteristics of FHN Nocturnal Trial participants who had baseline sodium concentration values

| **Baseline characteristics of FHN Nocturnal Trial participants with baseline sodium concentration values** | | | | | | | | | | |
| --- | --- | --- | --- | --- | --- | --- | --- | --- | --- | --- |
| **Characteristic** | | **N (available data for respective parameter)** | **3X Nocturnal Pts (N=39)** | **3X Nocturnal Pts with SNa=<138 mEq/L (N=21)** | | **3X Nocturnal Pts with SNa>138 mEq/L (N=18)** | **N (available data for respective parameter)** | **6X Nocturnal Pts (N=43)** | **6X Nocturnal Pts with SNa=<138 mEq/L (N=21)** | **6X Nocturnal Pts with SNa>138 mEq/L (N=22)** |
| Age (yrs.) | | 39 | 54.1 ± 13.1 | 51.9 ± 14.8 | | 55.9 ± 11.5 | 43 | 52.3 ± 14.4 | 52.3 ± 14.4 | 52.3 ± 14.4 |
| Female (%) | | 39 | 13 (33%) | 5 (28%) | | 8 (38%) | 43 | 15 (35%) | 15 (35%) | 15 (35%) |
| Race Black (%) White (%) Native American, Aboriginal Canadian, Alaskan Native (%) Asian (%) Native Hawaiian or other Pacific Islander (%) Other/mixed/unknown (%) | | 39 | . 11 (28%) 19 (49%) 2 (5%) 6 (15%) 0 1 (3%) | . 4 (22%) 7 (39%) 1 (6%) 5 (28%) 0 1 (6%) | | . 7 (33%) 12 (57%) 1 (5%) 1 (5%) 0 0 | 43 | . 12 (28%) 25 (58%) 1 (2%) 5 (12%) 0 0 | . 12 (28%) 25 (58%) 1 (2%) 5 (12%) 0 0 | . 12 (28%) 25 (58%) 1 (2%) 5 (12%) 0 0 |
| Ave. Weekly Predialysis Systolic BP (mmHg) | | 39 | 154 ± 23 | 149 ± 24 | | 157 ± 21 | 43 | 145 ± 13 | 145 ± 13 | 145 ± 13 |
| Ave. Weekly Predialysis Diastolic BP (mmHg) | | 39 | 83.7 ± 13.1 | 81.3 ± 14.8 | | 85.7 ± 11.4 | 43 | 79.6 ± 10.8 | 79.6 ± 10.8 | 79.6 ± 10.8 |
| Ave. Weekly Postdialysis Systolic BP (mmHg) | | 39 | 141 ± 21 | 142 ± 20 | | 140 ± 22 | 43 | 135 ± 17 | 135 ± 17 | 135 ± 17 |
| Ave. Weekly Postdialysis Diastolic BP (mmHg) | | 39 | 76.6 ± 13.7 | 74.9 ± 12.9 | | 78.1 ± 14.4 | 43 | 74.6 ± 11.9 | 74.6 ± 11.9 | 74.6 ± 11.9 |
| Left Ventricular Mass (g) | | 39 | 138 ± 42 | 128 ± 39 | | 147 ± 43 | 43 | 138 ± 48 | 138 ± 48 | 138 ± 48 |
| Left Ventricular End-diastolic Vol. (ml) | | 39 | 154 ± 44 | 147 ± 38 | | 159 ± 49 | 43 | 166 ± 51 | 166 ± 51 | 166 ± 51 |
| Extra-cellular fluid volume (L) | | 36 | 23.6 ± 5.5 | 20.4 ± 3.8 | | 25.9 ± 5.4 | 38 | 24.5 ± 6.3 | 24.5 ± 6.3 | 24.5 ± 6.3 |
| Extra-cellular fluid volume / Total Bodby Water (L) [BIA] | | 36 | 0.514 ± 0.072 | 0.483 ± 0.078 | | 0.535 ± 0.059 | 38 | 0.521 ± 0.073 | 0.521 ± 0.073 | 0.521 ± 0.073 |
| Extra-cellular fluid volume / Ave. Weekly Postdialysis Wt. (kg) | | 36 | 0.292 ± 0.040 | 0.287 ± 0.042 | | 0.296 ± 0.039 | 38 | 0.286 ± 0.030 | 0.286 ± 0.030 | 0.286 ± 0.030 |
| IDWG (% post HD body weight) | | 29 | 3.00 ± 1.48 | 3.48 ± 1.47 | | 2.61 ± 1.42 | 33 | 2.40 ± 1.46 | 2.78 ± 1.55 | 1.99 ± 1.28 |
| IDWG (% of ECV) | | 26 | 10.6 ± 5.3 | 13.1 ± 5.4 | | 9.01 ± 4.77 | 28 | 8.61 ± 5.34 | 9.96 ± 5.37 | 7.26 ± 5.15 |
| time-integrated fluid load (TIFL; units liter × day) | | 26 | 2.94 ± 1.73 | 3.79 ± 1.40 | | 2.41 ± 1.75 | 28 | 2.77 ± 2.22 | 3.34 ± 2.12 | 2.21 ± 2.26 |
| BMI (kg/m2) | | 36 | 28.6 ± 7.1 | 25.2 ± 4.9 | | 31.0 ± 7.6 | 39 | 30.1 ± 8.5 | 30.1 ± 8.5 | 30.1 ± 8.5 |
| Predialysis Bicarbonate (mEq/L) | | 39 | 22.6 ± 3.5 | 21.6 ± 3.2 | | 23.5 ± 3.6 | 43 | 22.8 ± 4.0 | 22.8 ± 4.0 | 22.8 ± 4.0 |
| Diabetes (%) | | 39 | 17 (44%) | 8 (44%) | | 9 (43%) | 43 | 18 (42%) | 18 (42%) | 18 (42%) |
| Left Ventricular Ejection Fraction (%) | | 39 | 56.4 ± 10.4 | 57.1 ± 9.4 | | 55.9 ± 11.3 | 43 | 54.9 ± 11.6 | 54.9 ± 11.6 | 54.9 ± 11.6 |
|  |
|  |
| * Plus-minus values are means ±SD. Bracketed values are medians with interquartile ranges. | | | | |
